# Supplementary material for: Influence of Genetic and Non-Genetic Risk Factors for Serum Uric Acid Levels and Hyperuricemia in Mexicans
Source: PubMed Central journal article supplement (PMC6627998; doi:10.3390/nu11061336), 2019-06-14
Supplement: nutrients-11-01336-s001.pdf [file nutrients-11-01336-s001.pdf]

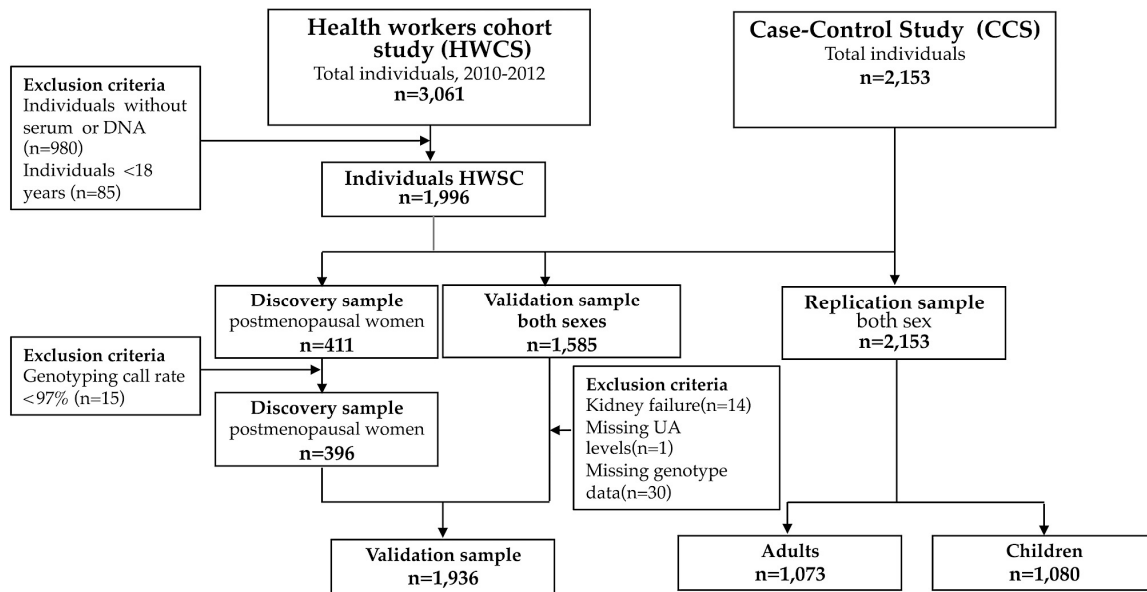

Supplementary Figure S1. Flowchart of study population

**Supplementary Table S1.** Characteristics of participants in the Health Worker Cohort Study

|                                                            | Discovery sample<br>n=396 | Validation sample<br>n=1543    | Total sample<br>n=1939 |
|------------------------------------------------------------|---------------------------|--------------------------------|------------------------|
| Age(years)*                                                | 61(55-68)                 | 48(37-58) <sup>^</sup>         | 52(40-61)              |
| Sex**                                                      |                           |                                |                        |
| Females**                                                  | 100                       | 61.8(59.4-64.3) <sup>^</sup>   | 69.6(67.6-71.7)        |
| BMI (kg/m)*                                                | 27.5(25.0-30.7)           | 26.5(23.9-29.6) <sup>^</sup>   | 26.7(24.1-29.8)        |
| Overweight**                                               | 46.2(41.3-51.1)           | 42.1(39.6-44.5)                | 42.9(40.7-45.1)        |
| Obesity**                                                  | 29.8(25.3-34.3)           | 22.8(20.7-24.8) <sup>^</sup>   | 24.2(22.2-26.1)        |
| Body fat proportion*                                       | 45.9(41.7-49.8)           | 39.5(31.8-42.7) <sup>^</sup>   | 41.4(33.4-46.9)        |
| Leisure time physical activity<br>(METs/week)*             | 2.6(0.4-12.8)             | 5.0(0.9-18.2) <sup>^</sup>     | 12.9(3.2-30.0)         |
| Smoking Current**                                          | 7.1(4.5-9.6)              | 13.8(12.0-15.5) <sup>^</sup>   | 12.9(11.4-14.5)        |
| Past**                                                     | 25.5(21.1-29.8)           | 27.8(25.6-30.0)                | 28.5(26.5-30.5)        |
| Metabolic Syndrome**                                       | 70.2(65.6-74.7)           | 57.0(54.6-60.0) <sup>^</sup>   | 59.8(57.6-62.0)        |
| Waist circumference (cm)*                                  | 95(88-103)                | 93(86-100) <sup>^</sup>        | 94(86-101)             |
| Systolic blood pressure (mmHg)*                            | 123(138-112)              | 117(107-127) <sup>^</sup>      | 118(108-129)           |
| Diastolic blood pressure (mmHg)*                           | 72(67-79)                 | 75(68-81) <sup>^</sup>         | 74(68-81)              |
| Fasting glucose(mg/dL)*                                    | 98(92-106)                | 97(90-105)                     | 97(90-105)             |
| HDL-C(mg/dL)*                                              | 45(38-54)                 | 44(37-51) <sup>^</sup>         | 44(37-52)              |
| Triglyceride (mg/dL)*                                      | 161(120-211)              | 154(108-207)                   | 156(112-209)           |
| Total cholesterol (mg/dL)*                                 | 123.4(83.3-178.3)         | 147.5(87.8-222.8) <sup>^</sup> | 141.9(86.2-214.4)      |
| LDL-C(mg/dL)*                                              | 133(160-105)              | 117(97-142) <sup>^</sup>       | 120(98-146)            |
| Insulin (μU/ml) <sup>α</sup> *                             | 8.8(5.1-13.1)             | 9.0(4.6-15.5)                  | 8.9(4.7-15.2)          |
| HOMA <sup>α</sup>                                          | 2.2(1.2-3.5)              | 2.2(1.1-4.1)                   | 2.2(1.1-4.0)           |
| ALT (U/L)*                                                 | 20(16-27)                 | 22(16-32) <sup>^</sup>         | 22(16-31)              |
| AST (U/L)*                                                 | 24(21-30)                 | 24(20-30)                      | 24(20-30)              |
| Uric acid (mg/dL)*                                         | 5.3(4.4-6.1)              | 5.4(4.5-6.4) <sup>^</sup>      | 5.3(4.5-6.4)           |
| Hyperuricemia**                                            | 33.8(29.2-38.5)           | 26.3(24.0-28.4) <sup>^</sup>   | 27.8(25.8-29.7)        |
| Femoral neck Bone Mineral Density<br>(g/cm <sup>2</sup> )* | 0.88(0.80-0.97)           | 0.98(0.88-1.08) <sup>^</sup>   | 0.96(0.86-1.06)        |
| Osteoporosis**                                             | 4.3(2.3-6.3)              | 1.7(1.0-2.4) <sup>^</sup>      | 2.2(1.6-2.9)           |
| Osteopenia**                                               | 32.8(28.2-                | 19.1(17.1-21.1) <sup>^</sup>   | 22.1(20.0-24.0)        |
| Spine BMD (g/cm <sup>2</sup> )*                            | 1.00(0.90-1.09)           | 1.12(1.01-1.22) <sup>^</sup>   | 1.09(0.98-1.20)        |
| Total energy intake (kcal/day)*                            | 1688(1244-2129)           | 1792(1353-2377) <sup>^</sup>   | 1761(1329-2335)        |
| Carbohydrate intake (% energy)*                            | 67.5(61.3-72.6)           | 65.4(59.4-71.0) <sup>^</sup>   | 65.9(59.7-71.4)        |
| Protein intake(% energy)*                                  | 12.5(10.9-14.7)           | 12.4(10.8-14.1)                | 12.4(10.8-14.2)        |
| Polyunsaturated fat intake (% energy)*                     | 4.1(3.3-4.9)              | 4.2(3.5-5.0) <sup>^</sup>      | 4.2(3.5-5.0)           |
| Saturated fat intake (% energy)*                           | 6.9(5.7-8.7)              | 7.1(5.6-8.9)                   | 7.1(5.6-8.8)           |
| Fiber intake (mg/day)*                                     | 24.8(18.6-34.6)           | 24.8(17.9-33.2)                | 24.8(18.0-33.4)        |
| Alcohol(g/day)*                                            | 0.3(0.0-1.4)              | 1.01(0.2-4.0) <sup>^</sup>     | 0.8(0.04-3.2)          |
| Soda (servings/day)***                                     | 0.29(0.47)                | 0.51(0.75)                     | 0.46(0.70)             |
| Diet soda(servings/day) ***                                | 0.06(0.27)                | 0.07(0.48)                     | 0.07(0.45)             |

\*Median (P25-P75). \*\*Percentage (95% CI). \*\*\*Mean (SD). P values from Wilcoxon test or Student's t-test (continuous variables) or chi2 test (categorical variables). <sup>α</sup>Only 1282 individuals have available insulin measurements. <sup>^</sup>P value <0.05

**Supplementary Table S2.** Association between metabolic syndrome, its components, diet, smoking and hyperuricemia

|                                                                               | HWCS*                |                        | CCS-Adults***        |                        | CCS-Children***     |                     |
|-------------------------------------------------------------------------------|----------------------|------------------------|----------------------|------------------------|---------------------|---------------------|
|                                                                               | Males<br>OR (95% CI) | Females<br>OR (95% CI) | Males<br>OR (95% CI) | Females<br>OR (95% CI) | Boys<br>OR (95% CI) | Girls<br>OR(95% CI) |
| Metabolic syndrome (MS)                                                       | 2.53 (1.69-3.77)     | 2.57 (1.91-3.46)       | 2.12 (1.24-3.62)     | 4.24 (2.88-6.24)       | 2.58 (1.59-4.16)    | 6.44 (3.77-11.01)   |
| MS components                                                                 |                      |                        |                      |                        |                     |                     |
| Waist circumference $\alpha$                                                  | 1.01 (0.99-1.03)     | 0.99 (0.97-1.01)       | 2.47 (1.40-4.37)     | 4.13 (1.96-8.71)       | 2.59 (1.67-4.05)    | 5.66 (3.19-10.1)    |
| Triglycerides ( $\geq 150$ mg/dL)                                             | 2.49 (1.68-3.70)     | 2.10 (1.62-2.72)       | 1.74 (1.04-2.93)     | 2.67 (1.86-3.84)       | 2.01 (1.27-3.15)    | 3.45 (2.15-5.56)    |
| HDL-C $\alpha$                                                                | 1.83 (1.27-2.66)     | 1.35 (1.03-1.76)       | 2.03 (1.21-3.41)     | 2.27 (1.48-3.49)       | 1.52 (0.96-2.39)    | 2.25 (1.37-3.69)    |
| Blood pressure ( $\geq 130/85$ mmHg,<br>$>90$ th percentile in children)      | 1.59 (1.08-2.32)     | 1.58 (1.19-2.10)       | 1.76 (0.88-3.52)     | 1.37 (0.76-2.54)       | --                  | --                  |
| Fasting blood glucose ( $\geq 100$ mg/dL , $\geq$<br>$110$ mg/dL in children) | 1.02 (0.70-1.47)     | 1.75 (1.35-2.27)       | 1.45 (0.82-2.57)     | 3.31 (2.25-4.86)       | 1.39 (0.80-2.41)    | 1.12 (0.51-2.46)    |
| Visceral adiposity index                                                      |                      |                        |                      |                        |                     |                     |
| 1st Quartile                                                                  | 1.0                  | 1.0                    | 1.0                  | 1.0                    | 1.0                 | 1.0                 |
| 2nd Quartile                                                                  | 1.96 (1.02-3.78)     | 1.59 (1.00-2.52)       | 1.18 (0.46-3.00)     | 2.89 (1.23-6.81)       | 1.41 (0.60-3.34)    | 0.80 (0.30-2.13)    |
| 3rd Quartile                                                                  | 1.84 (0.89-3.82)     | 2.00 (1.17-3.44)       | 1.43 (0.47-4.38)     | 5.04 (1.96-12.93)      | 3.15 (1.06-9.34)    | 2.68 (1.0-7.20)     |
| 4th Quartile                                                                  | 3.12 (1.17-8.32)     | 2.15 (1.01-4.56)       | 1.68 (0.36-7.96)     | 6.24 (1.89-20.55)      | 7.16 (1.48-34.53)   | 7.52 (1.97-28.72)   |
| BMI (kg/m <sup>2</sup> ), Normal $\alpha$                                     | 1.0                  | 1.0                    | 1.0                  | 1.0                    | 1.0                 | 1.0                 |
| Overweight $\alpha$                                                           | 2.33 (1.48-3.69)     | 1.45 (1.05-2.00)       | --                   | --                     | --                  | --                  |
| Obesity $\alpha$                                                              | 3.06 (1.78-5.34)     | 2.64 (1.88-3.70)       | 3.75 (2.02-6.98)     | 3.64 (2.25-5.86)       | 4.21 (2.17-8.17)    | 13.43 (4.98-36.19)  |
| Soda (servings/day)**                                                         | 1.04 (0.83-1.30)     | 1.26 (1.02-1.56)       | --                   | --                     | --                  | --                  |
| Diet soda(servings/day) **                                                    | 1.20 (0.21-6.95)     | 0.94 (0.68-1.31)       | --                   | --                     | --                  | --                  |
| Smoking status, Nonsmokers                                                    | 1.0                  | 1.0                    |                      |                        |                     |                     |
| Past smokers                                                                  | 0.77 (0.50-1.19)     | 0.98 (0.72-1.35)       | --                   | --                     | --                  | --                  |
| Current smokers                                                               | 1.15 (0.33-1.87)     | 2.35 (1.53-3.62)       | --                   | --                     | --                  | --                  |

Hyperuricemia was defined as a serum urate levels  $\geq 7$ mg/dL in males and  $\geq 5.8$  mg/dL in females; in children was defined as a serum urate levels  $\geq 5.5$  mg/dL for subjects under 7 years of age,  $\geq 5.9$  mg/dL for subjects age 7-8,  $\geq 6.1$  mg/dL for subjects age 9-12,  $\geq 6.2$  mg/dL for girls 12 and over and  $\geq 7.0$  mg/dL for boys 12 and over.  $\alpha$  Waist circumference ( $\geq 90$  cm in males  $\geq 80$  cm in females); HDL-C ( $\leq 40$  mg/dL in males  $\leq 50$  mg/dL in females); BMI (normal  $<25$  kg/m<sup>2</sup>, overweight 25- $<30$ kg/m<sup>2</sup>, obesity  $\geq 30$  kg/m<sup>2</sup>) \*Model adjusted for age, alcohol consumption, smoking status and physical activity. \*\* Model: additional adjustment for energy intake. \*\*\*Model only adjusted for age.

**Supplementary Table S3.** Association between hyperuricemia and Coronary heart disease from Health Workers Cohort Study

| HWSC    | Acid uric     | Participants        | Participants     | Crude           |         | Model I         |         | Model II        |         |
|---------|---------------|---------------------|------------------|-----------------|---------|-----------------|---------|-----------------|---------|
|         |               | without CHD<br>n(%) | with CHD<br>n(%) | OR (95% CI)     | P value | OR (95% CI)     | P value | OR (95% CI)     | P value |
| Total   | Normal        | 971(75.6)           | 314(68.7)        | 1.0             |         | 1.0             |         | 1.0             |         |
|         | Hyperuricemia | 330(25.4)           | 143(31.3)        | 1.34(1.06-1.69) | 0.014   | 1.18(0.91-1.54) | 0.208   | 1.36(1.00-1.85) | 0.047   |
| Males   | Normal        | 274(68.5)           | 114(71.7)        | 1.0             |         | 1.0             |         | 1.0             |         |
|         | Hyperuricemia | 126(31.5)           | 45(28.3)         | 0.86(0.57-1.29) | 0.459   | 1.06(0.61-1.81) | 0.842   | 0.76(0.40-1.42) | 0.384   |
| Females | Normal        | 697(77.4)           | 200(67.1)        | 1.0             |         | 1.0             |         | 1.0             |         |
|         | Hyperuricemia | 204(22.6)           | 98(32.9)         | 1.67(1.26-2.23) | 0.0004  | 1.33(0.96-1.82) | 0.070   | 1.63(1.14-2.33) | 0.008   |

SUA: Serum uric acid; Hyperuricemia: 7.0 mg/dL for males, and 5.8mg/dL for females. Model I: Adjustment for age (<38, 38-47, 48-57, 58-67 and >67 years) and sex. Model II: Additional adjustment for medications (anti-inflammatories and aspirin), creatinine levels, alcohol intake (quintile), leisure time physical activity (quintile), smoking and menopause. \*\* Exclusion of individuals with previous CHD.

**Supplementary Figure S2.** LocusZoom plot of the region associated with Serum Uric Acid on chromosome 4, after imputation in the discovery sample. SNPs are color-coded according to the linkage disequilibrium (LD) with the genotyped SNP (purple diamond) indicated by the arrow.

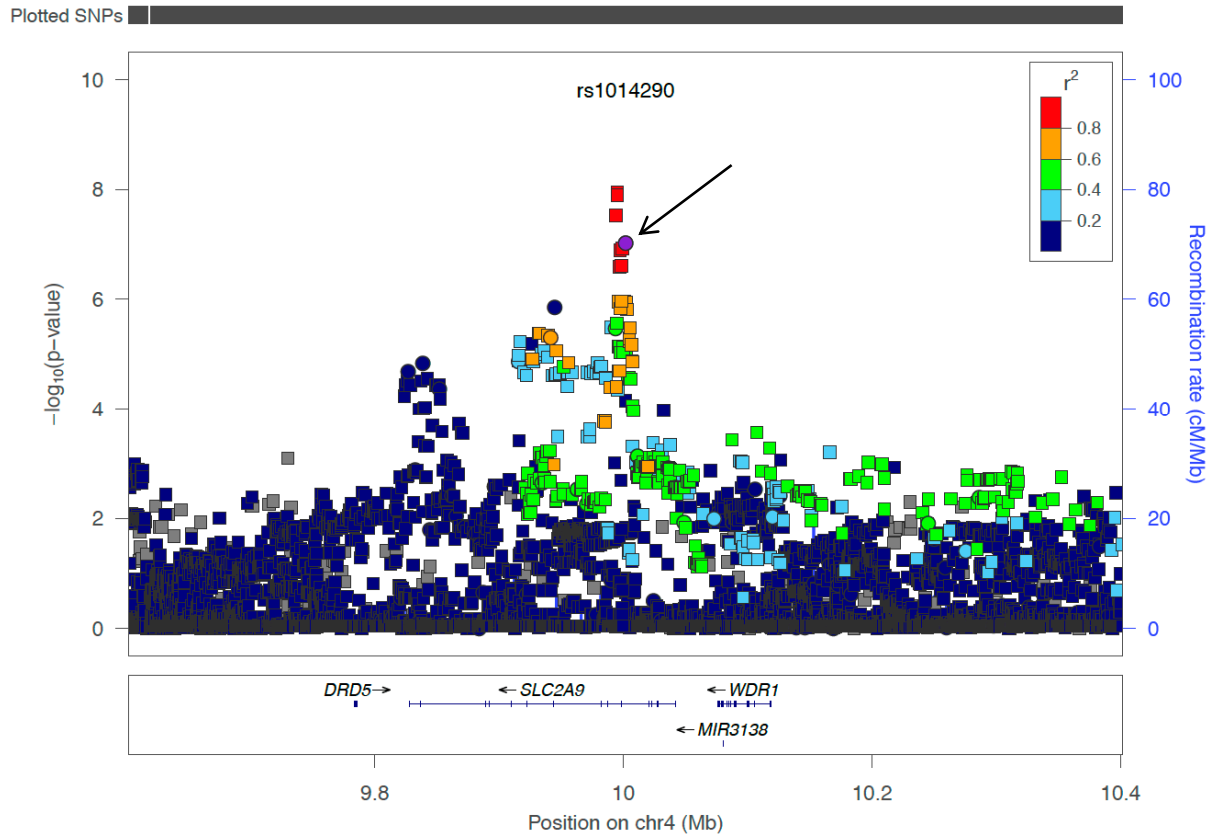

**Supplementary Table S4.** Top SNPs associated with serum Uric Acid in the discovery sample.

| SNP ID             | Chr | Position <sup>a</sup> | Gene                    | A1 <sup>b</sup> | A2 | MAF <sup>c</sup> | $\beta$ | SE    | <i>P</i> -value         |
|--------------------|-----|-----------------------|-------------------------|-----------------|----|------------------|---------|-------|-------------------------|
| <i>rs338229</i>    | 1   | 58942533              | <i>DAB1 OMA1</i>        | C               | T  | 0.19             | 0.530   | 0.109 | 2.01 x 10 <sup>-6</sup> |
| <i>rs1418978</i>   | 1   | 56971724              | <i>PPAP2B</i>           | C               | T  | 0.32             | -0.419  | 0.094 | 9.81 x 10 <sup>-6</sup> |
| <i>rs7606088</i>   | 2   | 105515963             | <i>near to MRPS9</i>    | C               | G  | 0.337            | 0.446   | 0.089 | 9.06 x 10 <sup>-7</sup> |
| <i>rs11124085</i>  | 2   | 106758629             | <i>UXS1</i>             | G               | A  | 0.12             | 0.596   | 0.127 | 3.51 x 10 <sup>-6</sup> |
| <i>rs2139266</i>   | 3   | 140526480             | <i>TRIM42-SLC25A36</i>  | C               | T  | 0.352            | 0.391   | 0.084 | 4.84 x 10 <sup>-6</sup> |
| <i>rs3775948</i>   | 4   | 9995256               | <i>SLC2A9</i>           | G               | A  | 0.344            | 0.447   | 0.447 | 4.05 x 10 <sup>-7</sup> |
| <i>rs1014290</i>   | 4   | 10001861              | <i>SLC2A9</i>           | G               | A  | 0.332            | 0.419   | 0.087 | 2.62 x 10 <sup>-6</sup> |
| <i>rs6597576</i>   | 9   | 135388415             | <i>C9orf171</i>         | A               | T  | 0.096            | -0.640  | 0.140 | 6.87 x 10 <sup>-6</sup> |
| <i>rs4936823</i>   | 11  | 123395713             | <i>GRAMD1B</i>          | G               | T  | 0.321            | 0.401   | 0.087 | 5.93 x 10 <sup>-6</sup> |
| <i>rs117226408</i> | 12  | 107704081             | <i>near to BTBD11</i>   | A               | G  | 0.057            | 0.815   | 0.180 | 8.81 x 10 <sup>-6</sup> |
| <i>rs1326384</i>   | 13  | 28356322              | <i>GSX1</i>             | C               | T  | 0.137            | 0.38    | 0.083 | 6.51 x 10 <sup>-6</sup> |
| <i>rs76579941</i>  | 15  | 41144467              | <i>SPINT1</i>           | G               | A  | 0.080            | -0.747  | 0.156 | 2.66 x 10 <sup>-6</sup> |
| <i>rs3759797</i>   | 15  | 41144467              | <i>RP11-532F12.5</i>    | A               | C  | 0.069            | -0.747  | 0.167 | 9.92 x 10 <sup>-6</sup> |
| <i>rs36014496</i>  | 16  | 12930516              | <i>CPPED1-SHISA9</i>    | A               | T  | 0.069            | 0.812   | 0.166 | 1.52 x 10 <sup>-6</sup> |
| <i>rs138486365</i> | 18  | 5860062               | <i>near to TMEM200C</i> | A               | G  | 0.277            | -0.432  | 0.093 | 5.17 x 10 <sup>-6</sup> |

<sup>a</sup>Chromosomal position (Mb) based on human genome build 19, dbSNP build 37.

<sup>b</sup>Allele minor.

<sup>c</sup>Minor allele frequency (MAF) estimated from the discovery samples.

**Supplementary Table S5.** Replication analysis of the top SNPs associated with serum uric acid levels in the Mexican population.

| SNP                  | MA       | HWCS*                       |                               | CCS-adult                  |              | CCS-children                 |              |
|----------------------|----------|-----------------------------|-------------------------------|----------------------------|--------------|------------------------------|--------------|
|                      |          | Beta<br>(95% CI)            | P value                       | Beta<br>(95% CI)           | P value      | Beta<br>(95% CI)             | P value      |
| rs1418978**          | C        | -0.42 (-0.60, 0.24)         | 9.81 x 10 <sup>-6</sup>       | 0.07 (-0.02, 0.167)        | 0.122        | 0.06 (-0.02, 0.152)          | 0.140        |
| <b>rs338229</b>      | <b>C</b> | <b>0.53 (0.32, 0.74)</b>    | <b>2.01 x 10<sup>-6</sup></b> | <b>0.03 (-0.08, 0.141)</b> | <b>0.583</b> | <b>0.01 (-0.09, 0.12)</b>    | <b>0.791</b> |
| rs7606088**          | C        | 0.45 (0.27, 0.62)           | 9.06 x 10 <sup>-7</sup>       | -0.13 (-0.23, -0.03)       | 0.009        | 0.03 (-0.06, 0.12)           | 0.568        |
| <b>rs11124085</b>    | <b>G</b> | <b>0.60 (0.35, 0.85)</b>    | <b>3.51 x 10<sup>-6</sup></b> | <b>0.02 (-0.13-0.16)</b>   | <b>0.832</b> | <b>0.02 (-0.12, 0.15)</b>    | <b>0.790</b> |
| rs2139266            | T        | 0.39 (0.23, 0.56)           | 4.84 x 10 <sup>-6</sup>       | -0.05 (-0.14, 0.05)        | 0.346        | -0.009 (-0.10, 0.08)         | 0.840        |
| <b>rs6597576**</b>   | <b>A</b> | <b>-0.64 (-0.91,-0.37)</b>  | <b>6.87 x 10<sup>-6</sup></b> | <b>0.03 (-0.14, 0.2)</b>   | <b>0.720</b> | <b>-0.08 (-0.24, 0.09)</b>   | <b>0.353</b> |
| rs1326384            | C        | 0.38 (0.22-0.54)            | 6.51 x 10 <sup>-6</sup>       | 0.04 (-0.04, 0.13)         | 0.318        | -0.06 (-0.14, 0.03)          | 0.181        |
| rs36014496**         | A        | 0.81 (0.49, 1.14)           | 1.52 x 10 <sup>-6</sup>       | -0.15 (-0.28, -0.009)      | 0.036        | -0.06 (-0.19, 0.06)          | 0.324        |
| <b>rs138486365**</b> | <b>A</b> | <b>-0.43 (-0.61, -0.25)</b> | <b>5.17 x 10<sup>-6</sup></b> | <b>-0.05 (-0.15, 0.04)</b> | <b>0.275</b> | <b>0.009 (-0.08, -0.097)</b> | <b>0.849</b> |

\*The HWCS (n=411). \*\* Proxies for rs1418978, rs7606088, rs6597576, rs36014496 and rs138486365; were rs4912314, rs6719286, rs12005531, rs12929323 and rs3936100, respectively. Models included age (<38, 38-47, 48-57, 58-67 and >67 years), sex, body mass index (normal, overweight and obesity), glucose levels (normal, intolerance and diabetes), medications (anti-inflammatories and diuretics), menopause, family cluster and creatinine levels.

**Supplementary Table S6.** Multivariate logistic regression for the relationship between polymorphisms in the *SLC2A9* and *ABCG2* genes and hyperuricemia

| SNP                                           | MA | HWCS                |                         | CCS-adult             |                        | CCS-children          |                         | Meta-analysis (all children and adults) |                         |                              |
|-----------------------------------------------|----|---------------------|-------------------------|-----------------------|------------------------|-----------------------|-------------------------|-----------------------------------------|-------------------------|------------------------------|
|                                               |    | OR<br>(95% CI)      | P value                 | OR<br>(95% CI)        | P value                | OR<br>(95% CI)        | P value                 | OR<br>(95% CI)                          | P value                 | P-value for<br>heterogeneity |
| rs11722228                                    | T  | 1.71<br>(1.44-2.0)  | 3.5 x 10 <sup>-10</sup> | 1.38<br>(1.08-1.75)   | 0.009                  | 2.50<br>(1.93-3.27)   | 8.8 x 10 <sup>-12</sup> | 1.80<br>(1.26-2.57)                     | 3.6 x 10 <sup>-8</sup>  | <0.01                        |
| rs3775948                                     | G  | 0.59<br>(0.50-0.69) | 2.7 x 10 <sup>-10</sup> | 0.59<br>(0.46-0.75)   | 1.3 x 10 <sup>-5</sup> | 0.45<br>(0.35-0.58)   | 1.5 x 10 <sup>-9</sup>  | 0.56<br>(0.48-0.64)                     | 1.2 x 10 <sup>-34</sup> | 0.17                         |
| rs1014290                                     | G  | 0.60<br>(0.51-0.71) | 2.9 x 10 <sup>-9</sup>  | 0.57<br>(0.45-0.72)   | 4.5 x 10 <sup>-6</sup> | 0.46<br>(0.35-0.59)   | 2.1 x 10 <sup>-9</sup>  | 0.56<br>(0.48-0.65)                     | 2.5 x 10 <sup>-37</sup> | 0.15                         |
| rs2231142                                     | T  | 1.38<br>(1.17-1.63) | 1.8 x 10 <sup>-4</sup>  | 1.46<br>(1.15-1.87)   | 0.002                  | 1.42<br>(1.11-1.83)   | 0.006                   | 1.42<br>(1.24-1.63)                     | 1.8 x 10 <sup>-96</sup> | 0.93                         |
| rs3775948<br>conditioned<br>for<br>rs11722228 | G  | 0.64<br>(0.52-0.79) | 4.0 x 10 <sup>-5</sup>  | 0.61<br>(0.47 – 0.79) | 0.0002                 | 0.56<br>(0.42 – 0.73) | 3.8 x 10 <sup>-5</sup>  | 0.61<br>(0.53 – 0.70)                   | 6.4 x 10 <sup>-12</sup> | 0.72                         |

Models included age (<38, 38-47, 48-57, 58-67 and >67 years), sex, body mass index (normal, overweight and obesity), glucose levels (normal, intolerance and diabetes), medications (anti-inflammatories and diuretics), menopause, family cluster and creatinine levels. SUA: Serum uric acid. Hyperuricemia:  $\geq 7.0$  mg/dL for males, and  $\geq 5.8$ mg/dL for females; in children was defined as a serum urate levels  $\geq 5.5$  mg/dL for subjects under 7 years of age,  $\geq 5.9$  mg/dL for subjects age 7-8,  $\geq 6.1$  mg/dL for subjects age 9-12,  $\geq 6.2$  mg/dL for girls 12 and over and  $\geq 7.0$  mg/dL for boys 12 and over.



**Supplementary Figure S3.** Distribution of selected biochemical traits, body mass index and metabolic syndrome in the Health Worker Cohort Study by rs11722228, rs2231142 separate and combined genotypes.

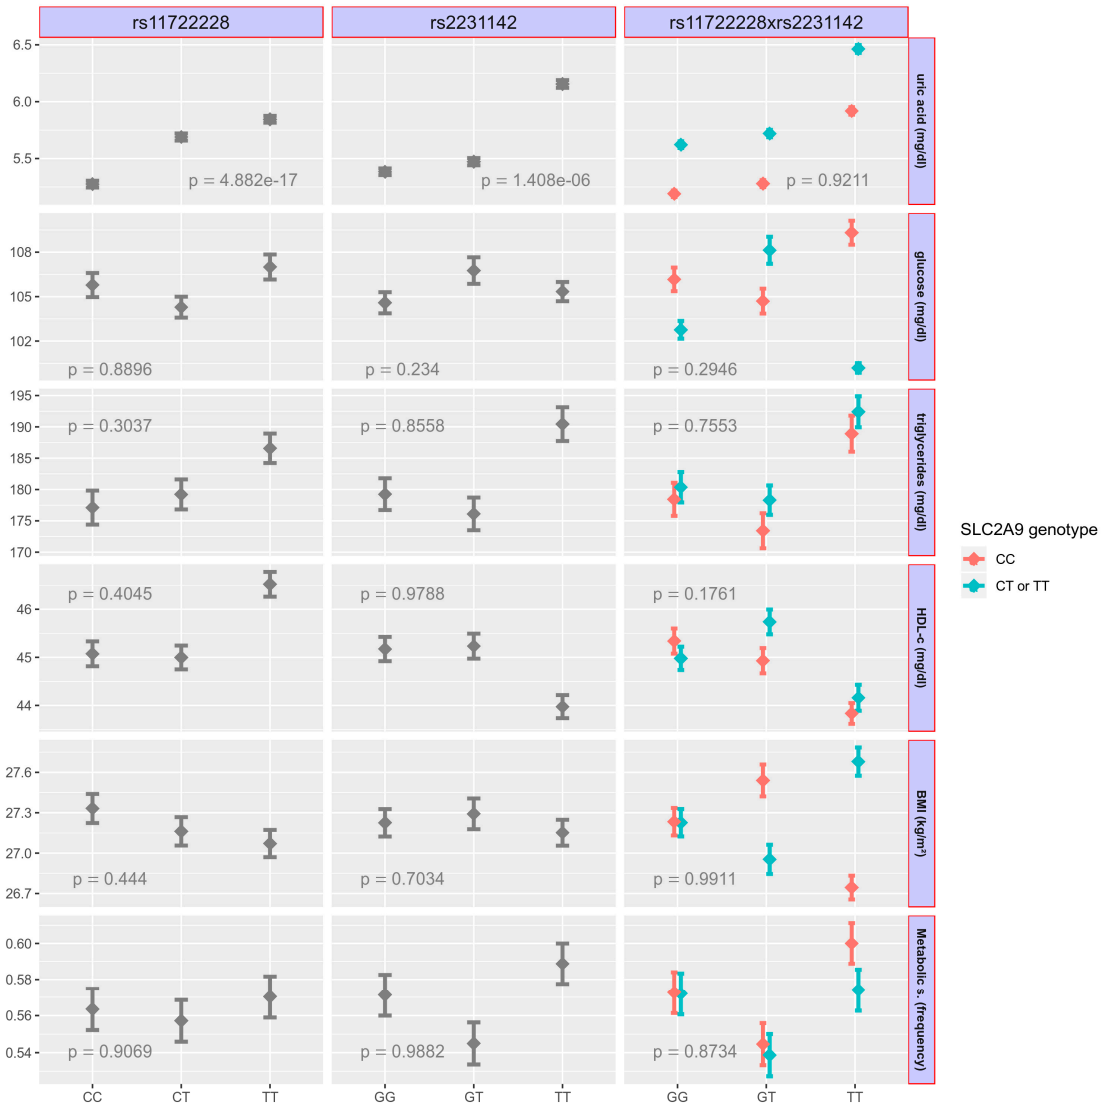

**Supplementary Figure S4.** Distribution of selected biochemical traits, body mass index and metabolic syndrome in the Adult Case Control Study by rs11722228, rs2231142 separate and combined genotypes.

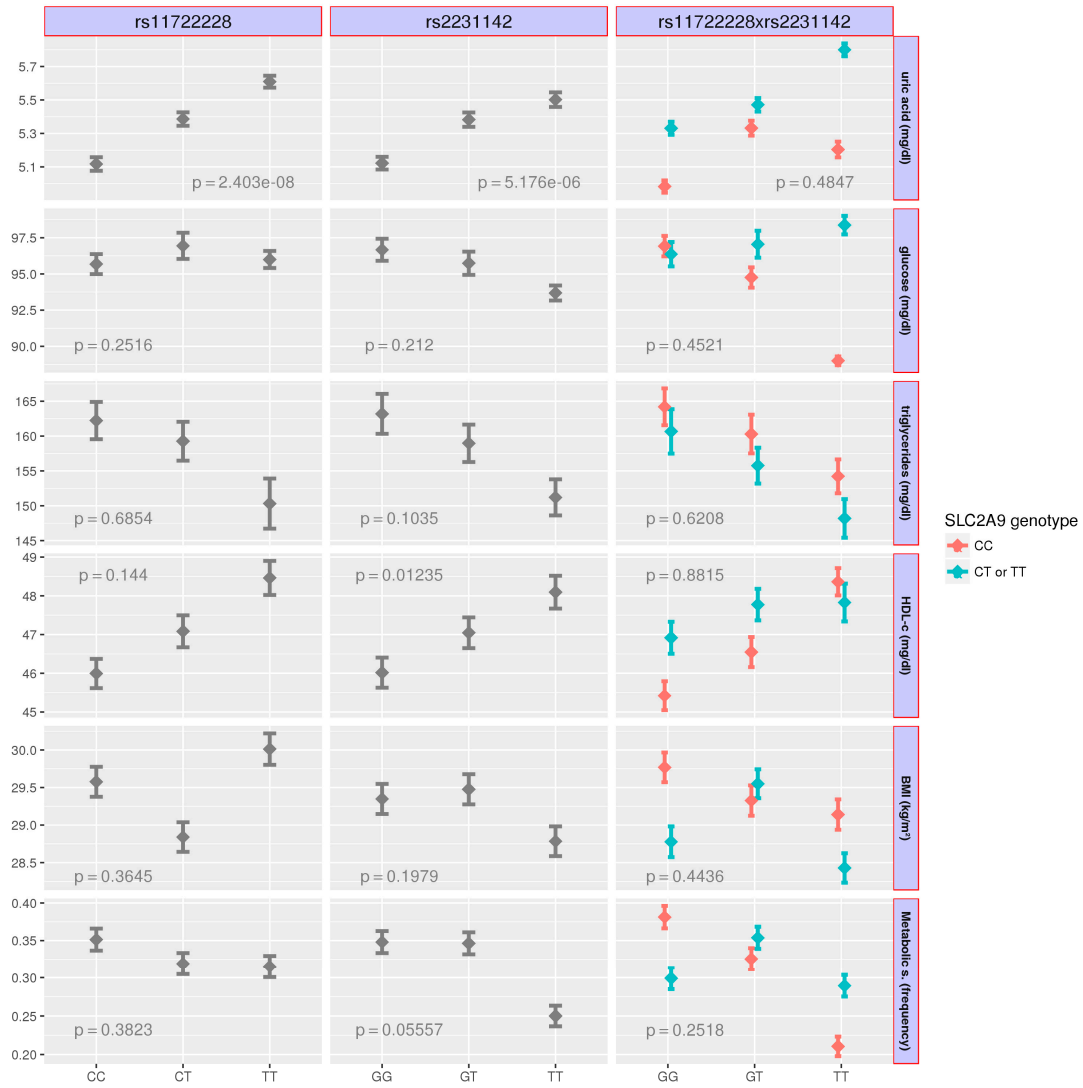

**Supplementary Figure S5.** Distribution of selected biochemical traits, body mass index percentile and metabolic syndrome in the Children Case Control Study by rs11722228, rs2231142 separate and combined genotypes.

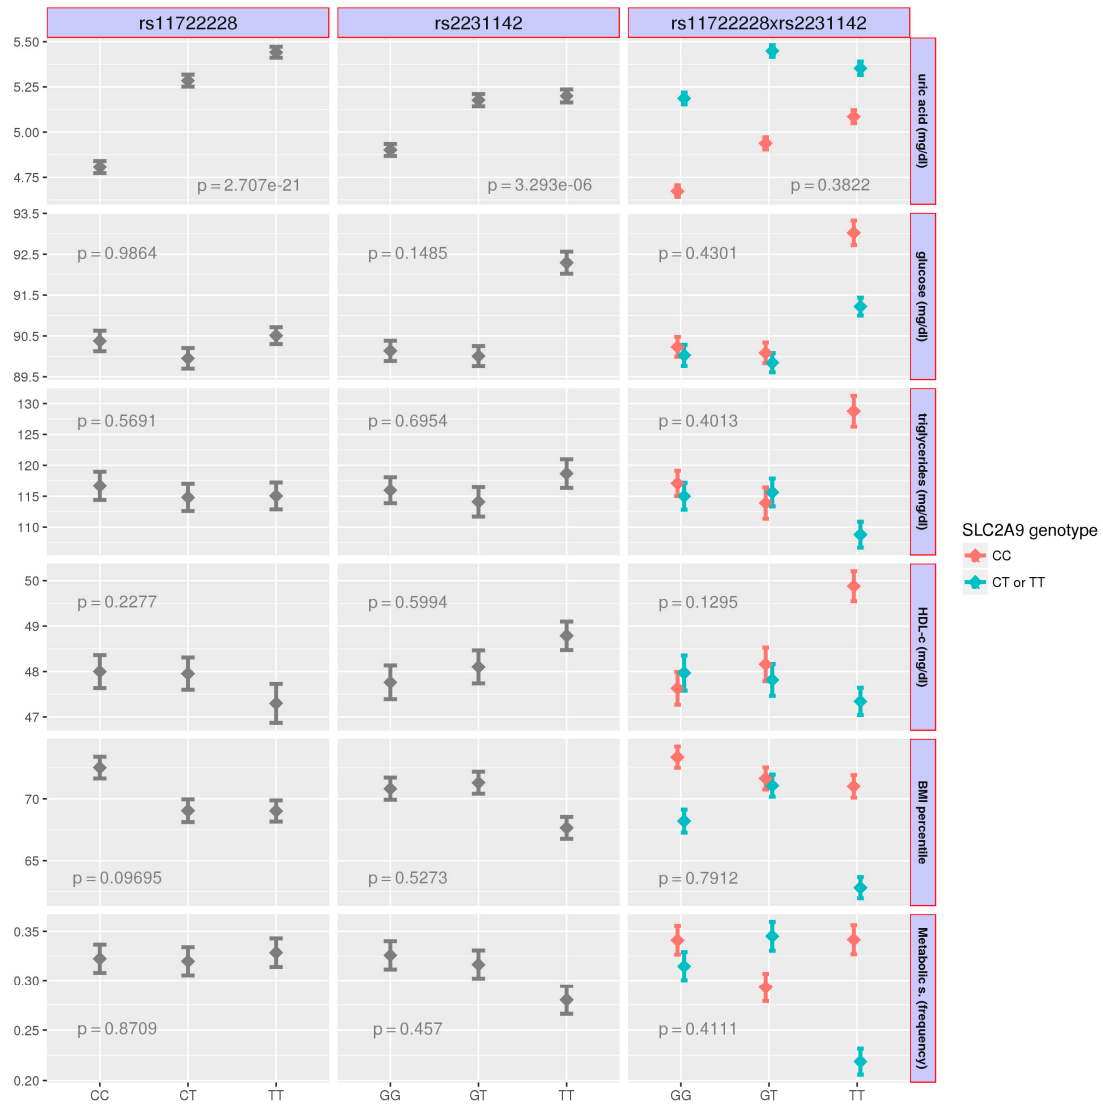

**Supplementary Table S7.** Multivariate logistic regression for the relationship between polymorphisms in the SLC2A9 gene and Coronary Heart Disease (CHD) in Health Workers Cohort Study

| SNP        | Allele | Crude           |         | Model I         |         | Model II        |         |
|------------|--------|-----------------|---------|-----------------|---------|-----------------|---------|
|            |        | OR(95% CI)      | P value | OR(95% CI)      | P value | OR(95% CI)      | P value |
| rs1014290  | G      | 0.92(0.79-1.08) | 0.328   | 0.94(0.78-1.12) | 0.486   | 0.97(0.79-1.20) | 0.785   |
| rs3775948  | G      | 0.97(0.83-1.13) | 0.682   | 0.99(0.83-1.19) | 0.944   | 1.04(0.85-1.28) | 0.697   |
| rs11722228 | T      | 1.01(0.85-1.20) | 0.903   | 1.06(0.87-1.29) | 0.552   | 1.10(0.88-1.38) | 0.406   |
| rs2231142  | T      | 0.76(0.63-0.91) | 0.002   | 0.76(0.63-0.93) | 0.008   | 0.78(0.62-0.98) | 0.030   |

Model I: Adjustment for (<38, 38-47, 48-57, 58-67 and >67 years) and sex. Model II: Additional adjustment for medications (anti-inflammatories and aspirin), creatinine levels, alcohol intake (quintile), leisure time physical activity (quintile), menopause, family cluster and smoking. \*\* Exclusion of individuals with previous CHD.
